# Supplementary material
Source: PubMed Central journal article supplement (PMC8155791)
Supplement: mic-167-1023-s001.pdf [file mic-167-1023-s001.pdf]

## **A mutagenic screen reveals NspS residues important for regulation of *Vibrio cholerae* biofilm formation**

Erin C. Young, Jackson T. Baumgartner, Ece Karatan, and Misty L. Kuhn

### **List of materials:**

- 1. Figure S1. Saturation of the mutagenic screen**
- 2. Table S1. Conservation of twenty binding site residues across functional and structural homologs of NspS**
- 3. Table S2. Effect of norspermidine on biofilm formation of mutant clones**

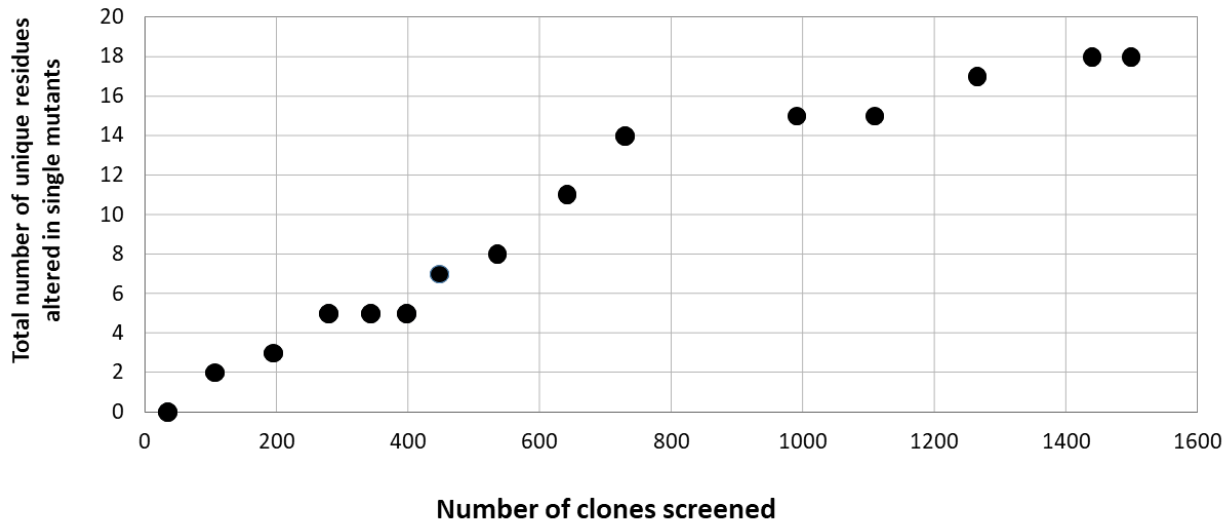

**Figure S1. Saturation of the mutagenic screen.** Number of unique hits that were obtained throughout the screening process versus the number of clones screened.

**Table S1: Conservation of twenty binding site residues across functional and structural homologs of NspS.** Residues that comprise the proposed NspS polyamine binding site were compared across functional homologs (shown with UniProt IDs) and structural homologs (indicated with PDB IDs). Homology models of the functional homologs and structural homologs were used to confirm presence of residues in the proposed binding site. The number of conserved binding site residues, percent identity of binding site residues, and percent identity of the total protein sequence for each homolog compared to NspS are shown at the bottom of the table. The titles “% conserved functional homologs” and “% conserved structural homologs” refer to the conservation of each individual residue within the binding site for each specific type of homolog. These values were used to generate **Figure 9B**.

|                                    | Functional homologs |        |        |        |        | Structural homologs |      |      |      |      |      | % conserved functional homologs | % conserved structural homologs |
|------------------------------------|---------------------|--------|--------|--------|--------|---------------------|------|------|------|------|------|---------------------------------|---------------------------------|
| Nsp5                               | A1SUA3              | A4VGH6 | A8FVY0 | Q2S7Q6 | Q92RK9 | 1A99                | 3TTM | 3TTN | 1POT | 4GL0 | 2V84 |                                 |                                 |
| W41                                | W48                 | W40    | W43    | W40    | W30    | W37                 | W35  | W34  | W34  | W42  | W37  | 100%                            | 100%                            |
| E42                                | G49                 | E41    | S44    | E41    | E31    | S38                 | S36  | T35  | T35  | G43  | T38  | 60%                             | 0%                              |
| D43                                | D50                 | E42    | E45    | D42    | D32    | D39                 | D37  | D36  | E36  | D44  | Y39  | 60%                             | 67%                             |
| T44                                | Y51                 | Y43    | Y46    | Y43    | Y33    | Y40                 | Y38  | Y37  | Y37  | Y45  | Y40  | 0%                              | 0%                              |
| N68                                |                     |        |        |        |        |                     |      |      |      |      |      | 0%                              | 0%                              |
| D69                                | S75                 | S67    | S70    | D67    | S57    | S64                 | S62  | S61  | S61  | S69  | S64  | 20%                             | 0%                              |
| D70                                | G76                 | G68    | D71    | D68    | D58    | N65                 | N63  | N62  | N62  | N70  | N65  | 60%                             | 0%                              |
| D90                                | D97                 | E88    | S92    | D89    | D78    | S85                 | S83  | S82  | S83  | S90  | S85  | 60%                             | 0%                              |
| V92                                | E99                 | I90    | V94    | L91    | N80    | S87                 | S85  | N84  | Y85  | Y92  | D87  | 20%                             | 0%                              |
| S93                                | V100                | S91    | D95    | M92    | G81    | F88                 | F86  | F85  | Y86  | A93  | F88  | 20%                             | 0%                              |
| F131                               | A140                | L131   | F138   | A135   | F121   | M134                | Y131 | L131 | I130 | F137 | Y133 | 40%                             | 17%                             |
| V172                               | I181                | E172   | R179   | S176   | S162   | E184                | T182 | D180 | R170 | R177 | R172 | 0%                              | 0%                              |
| E173                               | D182                | D173   | D180   | T177   | E163   | E185                | E183 | E181 | E171 | E178 | E173 | 20%                             | 100%                            |
| Y233                               | Y242                | Y233   | Y240   | Y237   | Y223   | W244                | Y241 | Y239 | W229 | F236 | F232 | 100%                            | 33%                             |
| S234                               | S243                | S234   | N241   | N238   | S224   | A245                | S242 | S240 | N230 | S237 | A233 | 60%                             | 50%                             |
| G235                               | D244                | G235   | G242   | G239   | G225   | G246                | G243 | G241 | G231 | G238 | E234 | 80%                             | 83%                             |
| D236                               | D245                | D236   | D243   | D240   | D226   | D247                | D244 | D242 | S232 | E239 | A235 | 100%                            | 50%                             |
| Y259                               | L268                | L261   | A264   | G261   | L250   | M274                | G271 | N269 | I253 | N260 | P259 | 0%                              | 0%                              |
| W261                               | F270                | W263   | W266   | W263   | W252   | F276                | F273 | W271 | W255 | W262 | Y261 | 80%                             | 50%                             |
| D263                               | D272                | D265   | D268   | D265   | D254   | D278                | D275 | D273 | D257 | D264 | D263 | 100%                            | 100%                            |
| # residues conserved binding site  | 7                   | 9      | 9      | 11     | 13     | 6                   | 8    | 9    | 5    | 8    | 3    |                                 |                                 |
| % identity binding site            | 35%                 | 45%    | 45%    | 55%    | 65%    | 30%                 | 40%  | 45%  | 25%  | 40%  | 15%  |                                 |                                 |
| Entire protein sequence % identity | 28%                 | 33%    | 22%    | 24%    | 31%    | 23%                 | 26%  | 25%  | 20%  | 25%  | 17%  |                                 |                                 |

**Table S2. Effect of norspermidine on biofilm formation of mutant clones.** Biofilms were formed in the absence or presence of norspermidine and quantified using the optical density biofilm assay. Raw data for all of the biological replicates, averages, and standard deviations where it could be calculated are shown. We were only able to complete two biological replicates with the five mutants listed at the bottom of the table due to restrictions resulting from COVID-19.

| Biofilm cell density without norspermidine |       |       |       |                 |                    | Biofilm cell density with norspermidine |       |       |       |                 |                    |
|--------------------------------------------|-------|-------|-------|-----------------|--------------------|-----------------------------------------|-------|-------|-------|-----------------|--------------------|
|                                            | Rep 1 | Rep 2 | Rep 3 | Biofilm Average | Standard Deviation |                                         | Rep 1 | Rep 2 | Rep 3 | Biofilm Average | Standard Deviation |
| Positive Control                           | 0.230 | 0.194 | 0.227 | 0.217           | 0.020              | Positive Control                        | 0.271 | 0.320 | 0.292 | 0.294           | 0.024              |
| Negative Control                           | 0.028 | 0.018 | 0.025 | 0.024           | 0.005              | Negative Control                        | 0.013 | 0.019 | 0.028 | 0.020           | 0.008              |
| R219S                                      | 0.017 | 0.022 | 0.018 | 0.019           | 0.002              | R219S                                   | 0.017 | 0.019 | 0.016 | 0.017           | 0.002              |
| R219H                                      | 0.031 | 0.033 | 0.026 | 0.030           | 0.003              | R219H                                   | 0.098 | 0.147 | 0.151 | 0.132           | 0.030              |
| L89W                                       | 0.038 | 0.040 | 0.044 | 0.041           | 0.003              | L89W                                    | 0.037 | 0.043 | 0.029 | 0.036           | 0.007              |
| R219C                                      | 0.037 | 0.032 | 0.021 | 0.030           | 0.008              | R219C                                   | 0.040 | 0.060 | 0.043 | 0.048           | 0.010              |
| S216I                                      | 0.016 | 0.013 | 0.018 | 0.016           | 0.002              | S216I                                   | 0.014 | 0.012 | 0.014 | 0.014           | 0.001              |
| S216N                                      | 0.025 | 0.018 | 0.024 | 0.022           | 0.004              | S216N                                   | 0.024 | 0.015 | 0.020 | 0.020           | 0.005              |
| V218L                                      | 0.038 | 0.025 | 0.044 | 0.036           | 0.010              | V218L                                   | 0.244 | 0.241 | 0.267 | 0.251           | 0.014              |
| F84V                                       | 0.022 | 0.072 | 0.032 | 0.042           | 0.027              | F84V                                    | 0.041 | 0.034 | 0.046 | 0.040           | 0.006              |
| V218A                                      | 0.087 | 0.017 | 0.108 | 0.071           | 0.047              | V218A                                   | 0.335 | 0.248 | 0.310 | 0.298           | 0.045              |
| S79C                                       | 0.047 | 0.053 | 0.034 | 0.044           | 0.010              | S79C                                    | 0.132 | 0.120 | 0.127 | 0.126           | 0.006              |
| L40H                                       | 0.056 | 0.042 | 0.035 | 0.044           | 0.011              | L40H                                    | 0.321 | 0.330 | 0.307 | 0.319           | 0.011              |
| L82R                                       | 0.027 | 0.025 | 0.041 | 0.031           | 0.009              | L82R                                    | 0.030 | 0.030 | 0.063 | 0.041           | 0.019              |
| L82P                                       | 0.045 | 0.026 | 0.030 | 0.034           | 0.010              | L82P                                    | 0.175 | 0.153 | 0.180 | 0.169           | 0.014              |
| S79G                                       | 0.048 | 0.036 | 0.044 | 0.042           | 0.006              | S79G                                    | 0.210 | 0.234 | 0.223 | 0.222           | 0.012              |
| L40R                                       | 0.041 | 0.025 | 0.019 | 0.028           | 0.011              | L40R                                    | 0.073 | 0.070 | 0.066 | 0.070           | 0.004              |
| D43N                                       | 0.028 | 0.024 | 0.024 | 0.025           | 0.002              | D43N                                    | 0.148 | 0.153 | 0.169 | 0.157           | 0.011              |
| S216R                                      | 0.016 | 0.013 | 0.042 | 0.024           | 0.016              | S216R                                   | 0.019 | 0.017 | 0.014 | 0.016           | 0.003              |
| N268D                                      | 0.016 | 0.016 | 0.035 | 0.023           | 0.011              | N268D                                   | 0.027 | 0.030 | 0.022 | 0.026           | 0.004              |
| F243V                                      | 0.032 | 0.023 | 0.034 | 0.030           | 0.006              | F243V                                   | 0.206 | 0.215 | 0.164 | 0.195           | 0.027              |
| D263V                                      | 0.048 | 0.019 | 0.035 | 0.034           | 0.015              | D263V                                   | 0.033 | 0.020 | 0.016 | 0.023           | 0.009              |
| N268S                                      | 0.034 | 0.042 | 0.037 | 0.038           | 0.004              | N268S                                   | 0.111 | 0.123 | 0.132 | 0.122           | 0.010              |
| F66V                                       | 0.027 | 0.029 | 0.021 | 0.026           | 0.004              | F66V                                    | 0.056 | 0.056 | 0.058 | 0.057           | 0.001              |
| L40P                                       | 0.036 | 0.035 | 0.054 | 0.042           | 0.011              | L40P                                    | 0.188 | 0.238 | 0.326 | 0.251           | 0.070              |
| F66Y                                       | 0.047 | 0.036 | 0.031 | 0.038           | 0.008              | F66Y                                    | 0.117 | 0.124 | 0.080 | 0.107           | 0.024              |
| P83L                                       | 0.021 | 0.035 |       | 0.028           |                    | P83L                                    | 0.211 | 0.252 |       | 0.231           |                    |
| N68I                                       | 0.025 | 0.044 |       | 0.035           |                    | N68I                                    | 0.293 | 0.334 |       | 0.313           |                    |
| R242L                                      | 0.009 | 0.021 |       | 0.015           |                    | R242L                                   | 0.279 | 0.304 |       | 0.292           |                    |
| F64L                                       | 0.032 | 0.049 |       | 0.041           |                    | F64L                                    | 0.101 | 0.303 |       | 0.202           |                    |
| L281F                                      | 0.038 | 0.048 |       | 0.043           |                    | L281F                                   | 0.251 | 0.267 |       | 0.259           |                    |
